# Supplementary material for: Biomass-Derived Sustainable Electrode Material for Low-Grade Heat Harvesting
Source: MDPI journal article supplement (doi:10.3390/nano13091488), 2023-04-27
Supplement: s1 [file s1]

## **Supplementary Materials**

Biomass-derived sustainable electrode material for low-grade heat harvesting

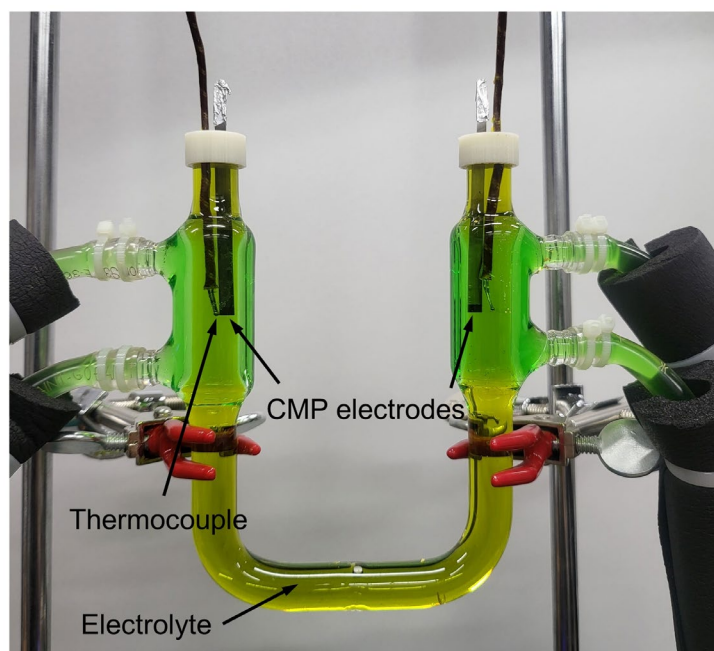

**Figure S1.** Experimental setup for measuring the temperature coefficient of the redox potential of  $\text{Fe}(\text{CN})_6^{3-}/\text{Fe}(\text{CN})_6^{4-}$ . Thermocouples were passivated with epoxy resin, preventing them from directly exposing the electrolyte.

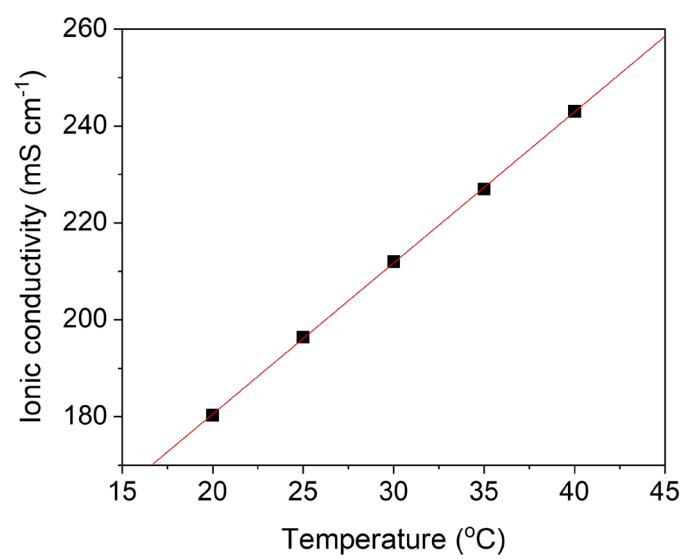

**Figure S2.** Dependence of ionic conductivity of 0.4 M  $\text{Fe(CN)}_6^{3-}/\text{Fe(CN)}_6^{4-}$  electrolyte on temperature.

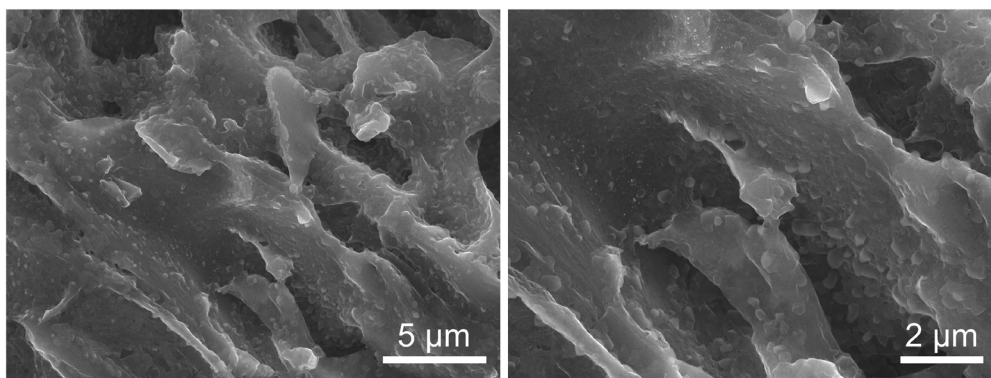

**Figure S3.** FESEM images of as-synthesized CMP-800 before washing with HCl and DI water.

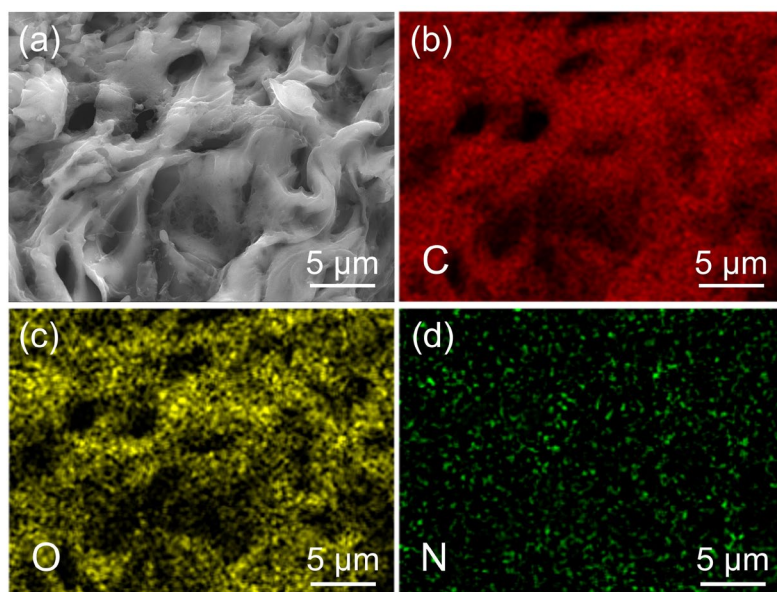

**Figure S4.** (a) FESEM and (b-d) EDS mapping images of AMP-800-1.

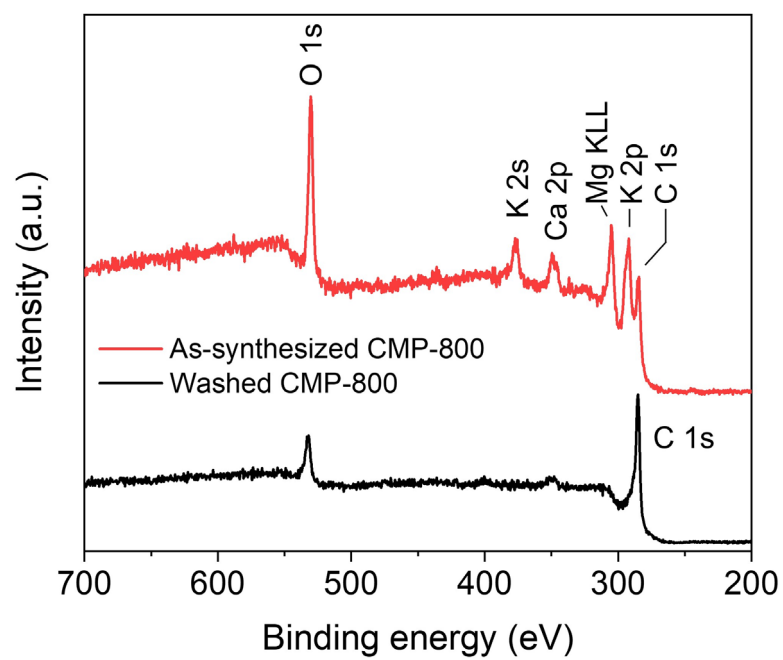

**Figure S5.** XPS survey spectra of as-synthesized CMP-800 and washed CMP-800.

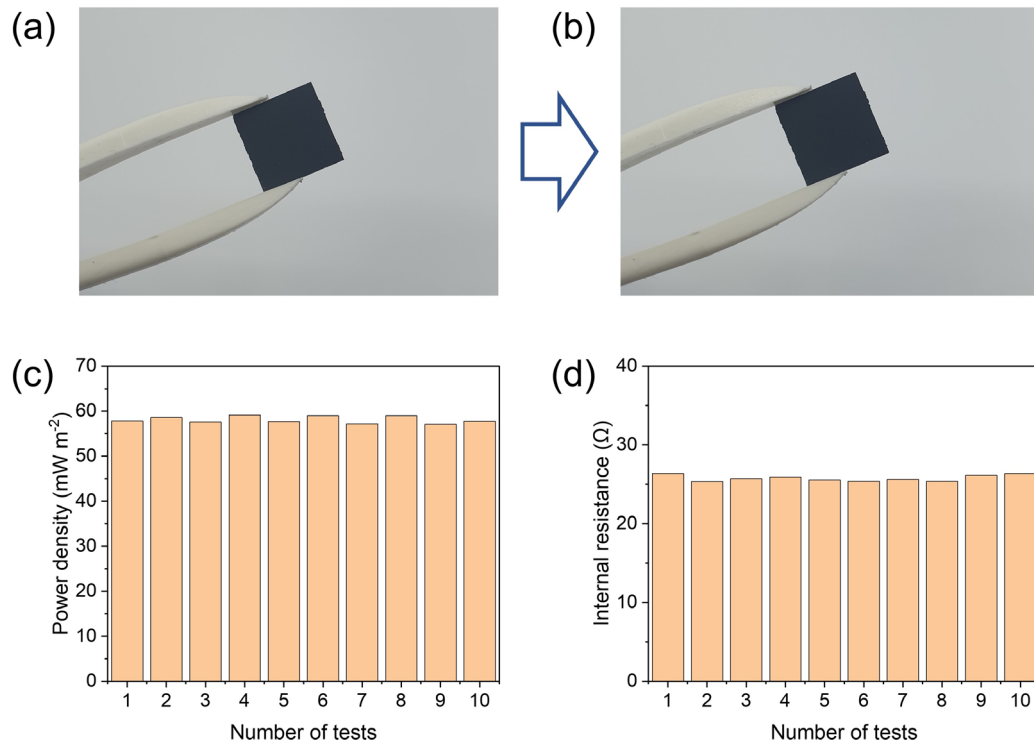

**Figure S6.** Optical images of a CMP-800 electrode (a) before and (b) after ten assembly and disassembly tests, (c) power density, and (d) internal resistance of thermocell with CMP-800 electrodes according to the number of tests.

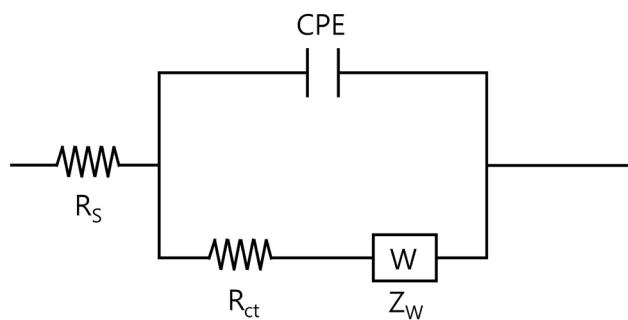

**Figure S7.** Equivalent circuit model of a thermocell for the analysis of EIS.  $R_s$  denotes the ohmic resistance,  $R_{ct}$  is the charge transfer resistance,  $Z_w$  accounts for the Warburg impedance, and CPE is the capacitance.



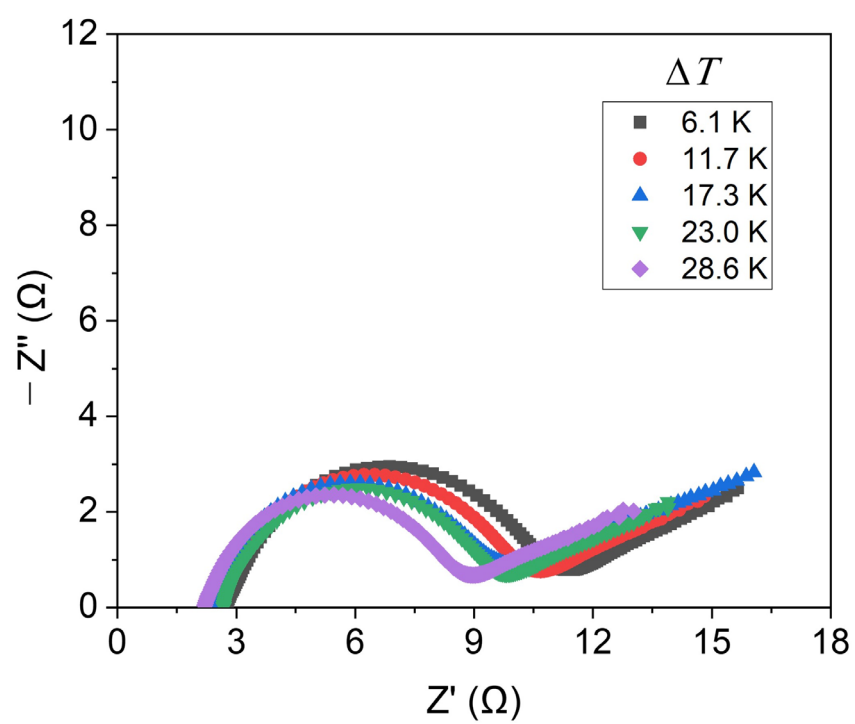

**Figure S8.** Nyquist plots of CMP-800 according to  $\Delta T$ .
